# Supplementary material for: Sandwich-type (phthalocyaninato)(porphyrinato) europium triple-decker nanotubes. Effects of the phthalocyanine peripheral substituents on the molecular packing
Source: Royal Society of Chemistry journal article supplement (doi:10.1039/c1dt11480h), 2011-01-01
Supplement: c1dt11480h.pdf [file c1dt11480h.pdf]

## Supporting Information

**Sandwich-Type Mixed (Phthalocyaninato)(porphyrinato) Europium  
Triple-Decker Nanotubes. Effect of the Phthalocyanine Peripheral Substituents  
on the Molecular Packing**

Jitao Lu, Pan Ma, Xiaomei Zhang,\* and Jianzhuang Jiang\*

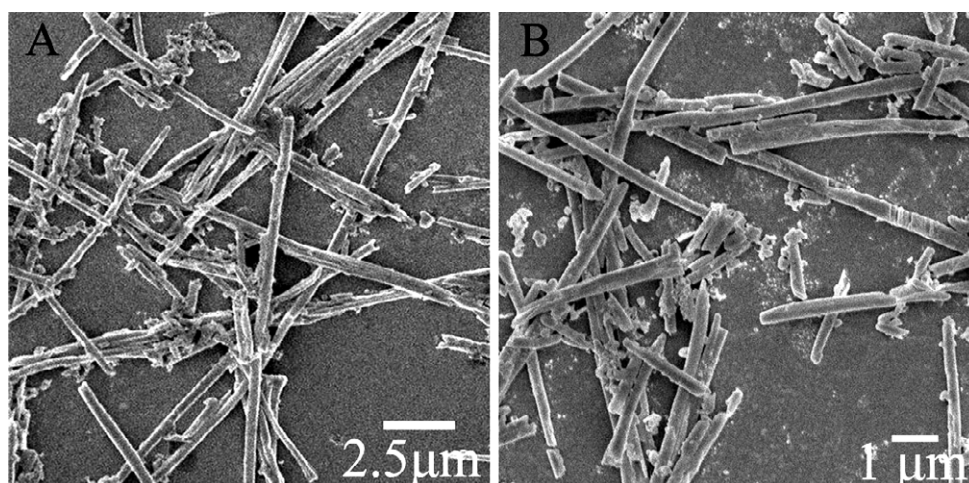

**Figure S1.** SEM images of nanotubes fabricated from **2** (A) and **3** (B) using anodized aluminum oxide as template after immersing for 5 days.

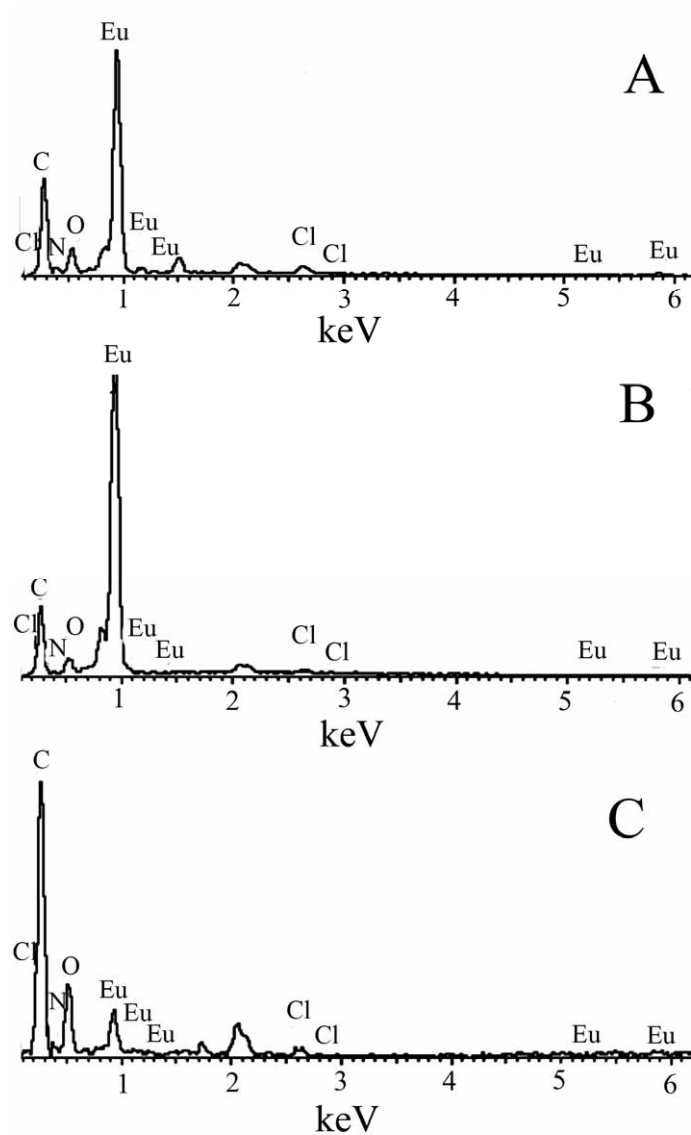

**Figure S2.** EDS images of nanotubes fabricated from **1** (A), **2** (B), and **3** (C).

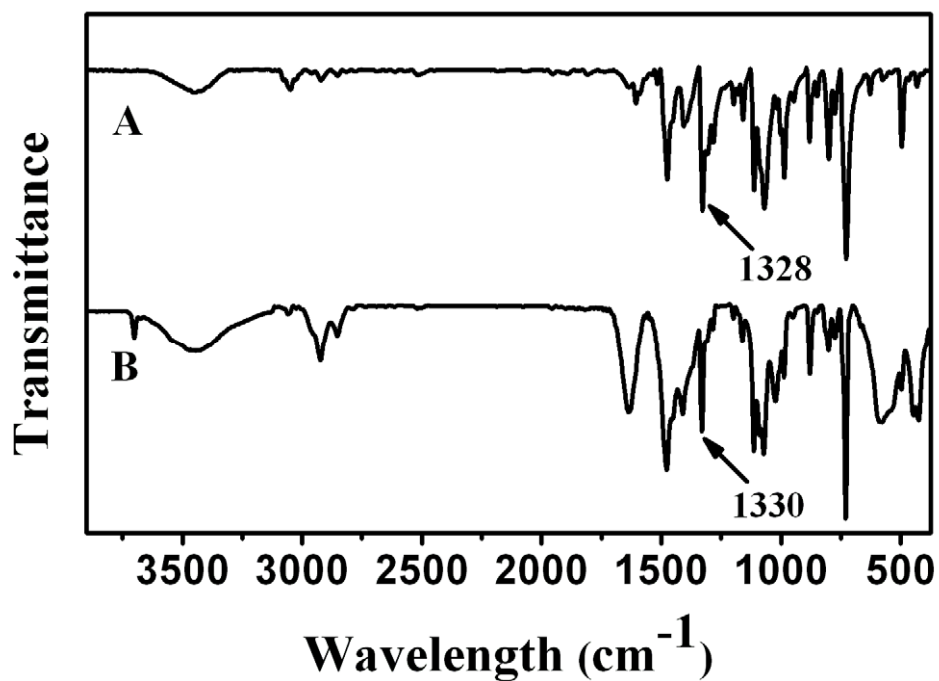

**Figure S3.** IR spectra of **1** (A) and nanotubes fabricated from **1** (B) in the region of 375-3900 cm<sup>-1</sup> with 2 cm<sup>-1</sup> resolution.

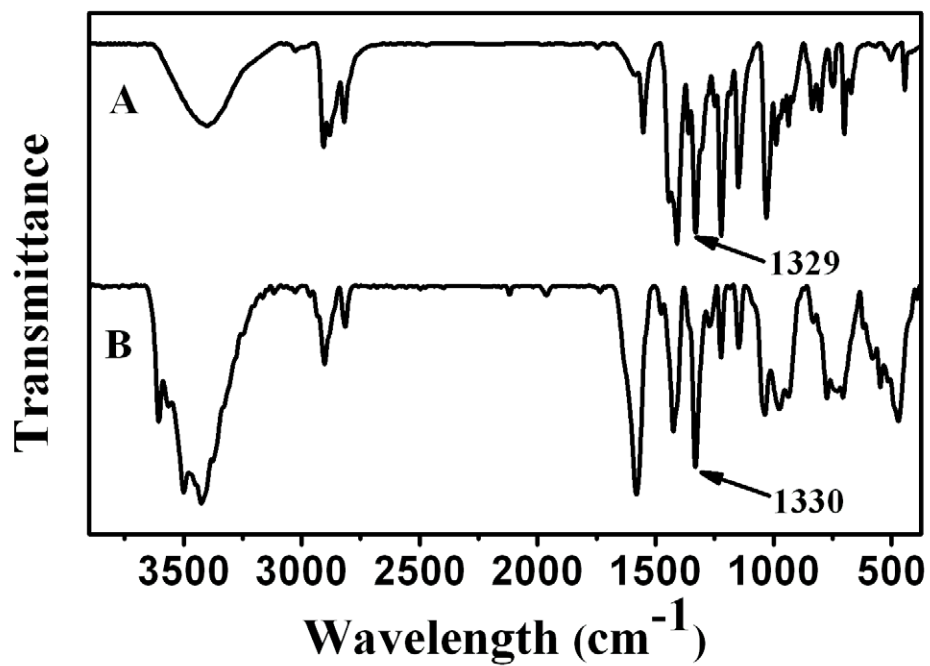

**Figure S4.** IR spectra of **2** (A) and nanotubes fabricated from **2** (B) in the region of 375-3900 cm<sup>-1</sup> with 2 cm<sup>-1</sup> resolution.

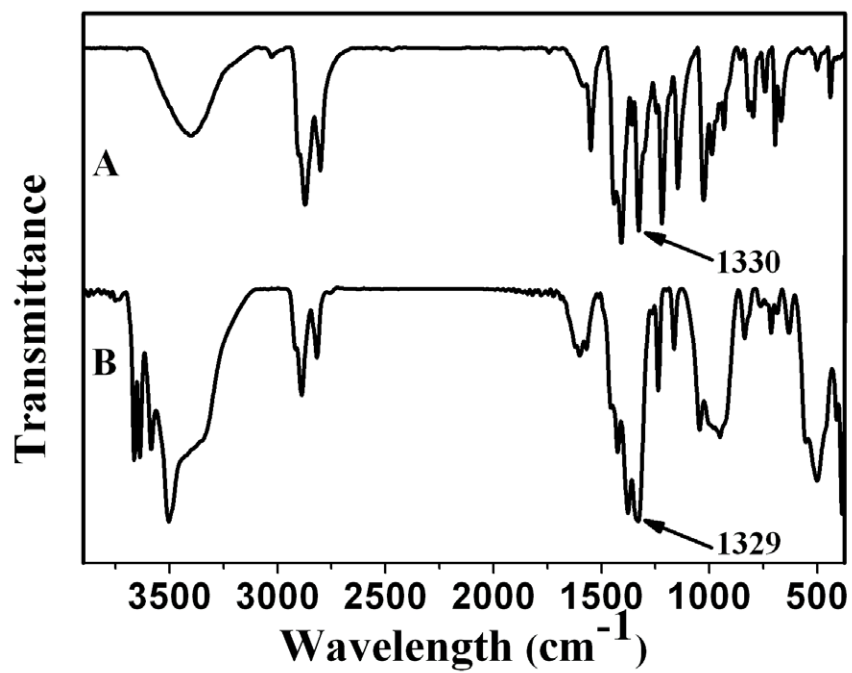

**Figure S5.** IR spectra of **3** (A) and nanotubes fabricated from **3** (B) in the region of 375-3900 cm<sup>-1</sup> with 2 cm<sup>-1</sup> resolution.
